# Supplementary material for: One-dimensional lanthanide coordination polymers: synthesis, structures, and single-ion magnetic behaviour
Source: Royal Society of Chemistry journal article supplement (doi:10.1039/c4dt03458a), 2015-01-01
Supplement: c4dt03458a1.pdf [file c4dt03458a1.pdf]

## Supporting information

### One-dimensional lanthanide coordination polymers: syntheses, structures, and single-ion magnet property

Hung-Kai Feng, Po-Jung Huang and Hui-Lien Tsai\*

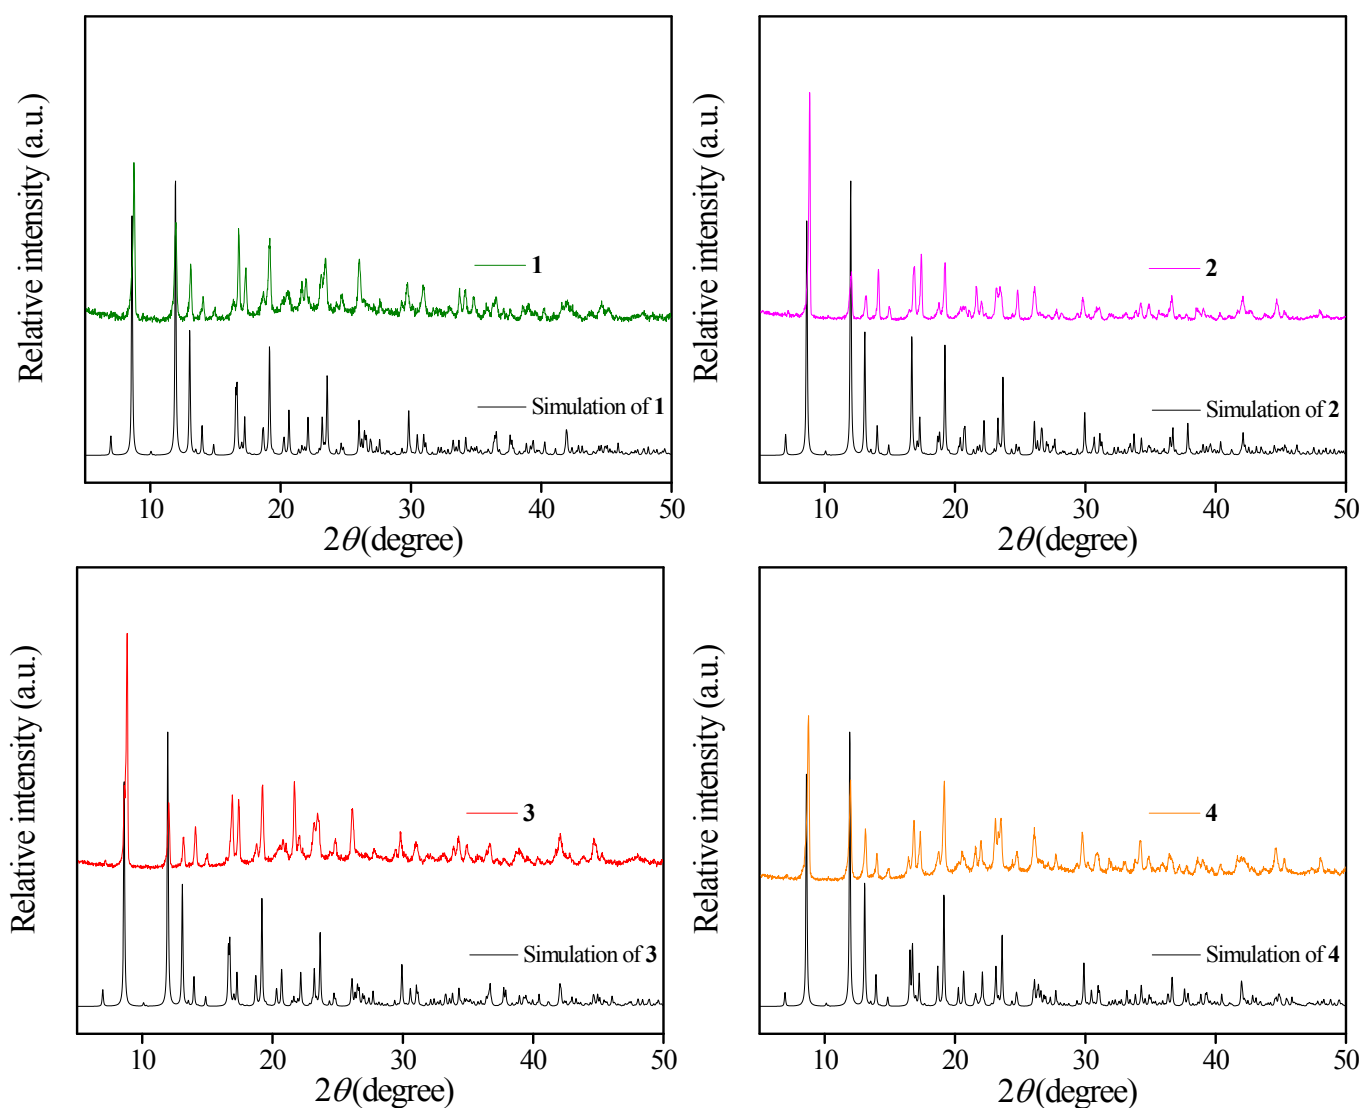

Fig. S1 Stimulated and experimental powder XRD patterns of complexes 1, 2, 3, and 4.

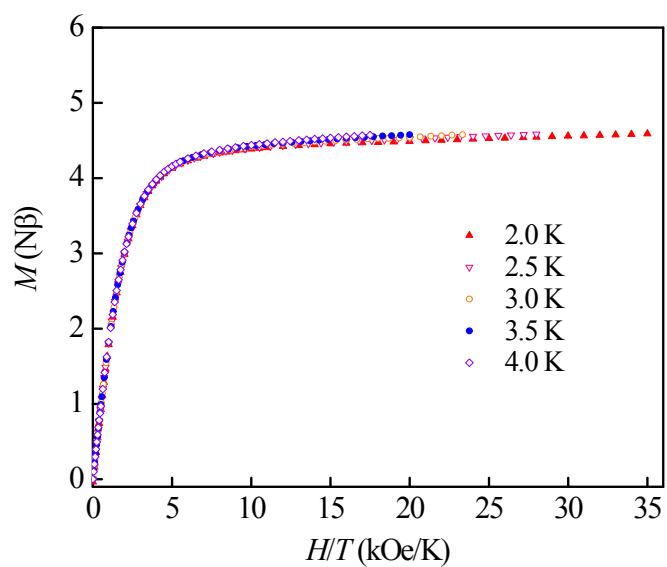

Fig. S2 Plots of reduced magnetisation  $M$  vs.  $H/T$  for complex **2** at 0–70 kOe and 2.0–4.0 K.

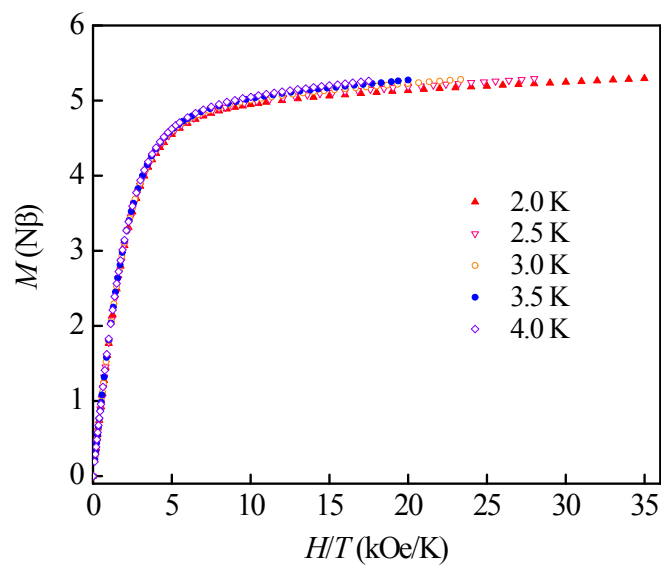

Fig. S3 Plots of the reduced magnetisation  $M$  vs.  $H/T$  for complex **1** at 0–70 kOe and 2.0–4.0 K.

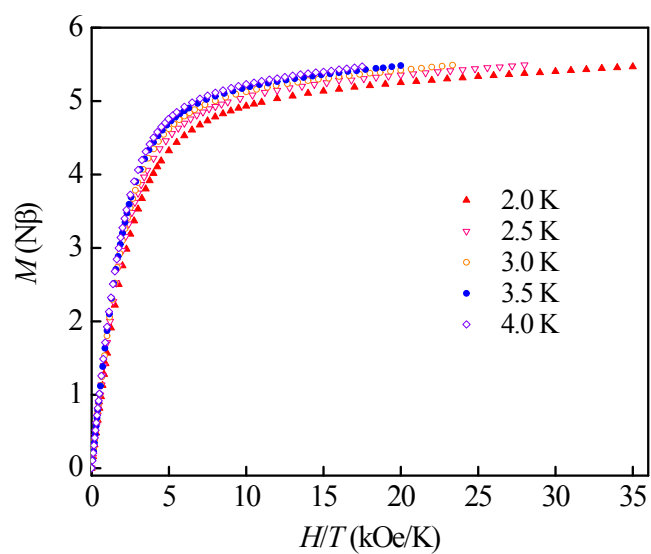

Fig. S4 Plots of the reduced magnetisation  $M$  vs.  $H/T$  for complex 3 at 0–70 kOe and 2.0–4.0 K.

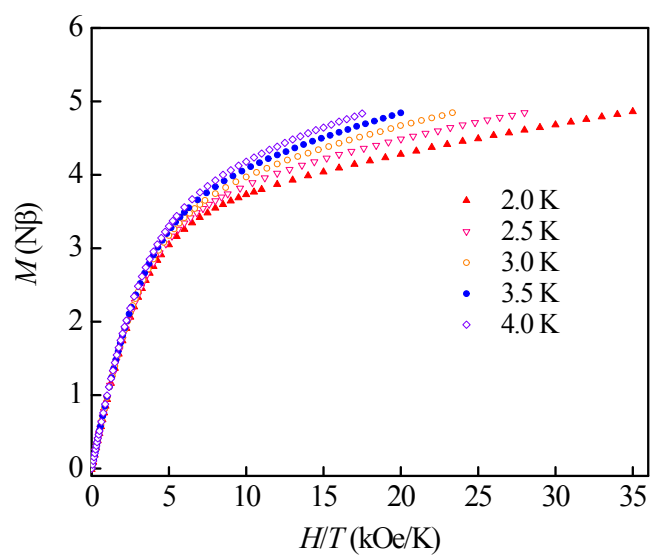

Fig. S5 Plots of the reduced magnetisation  $M$  vs.  $H/T$  for complex 4 at 0–70 kOe and 2.0–4.0 K.

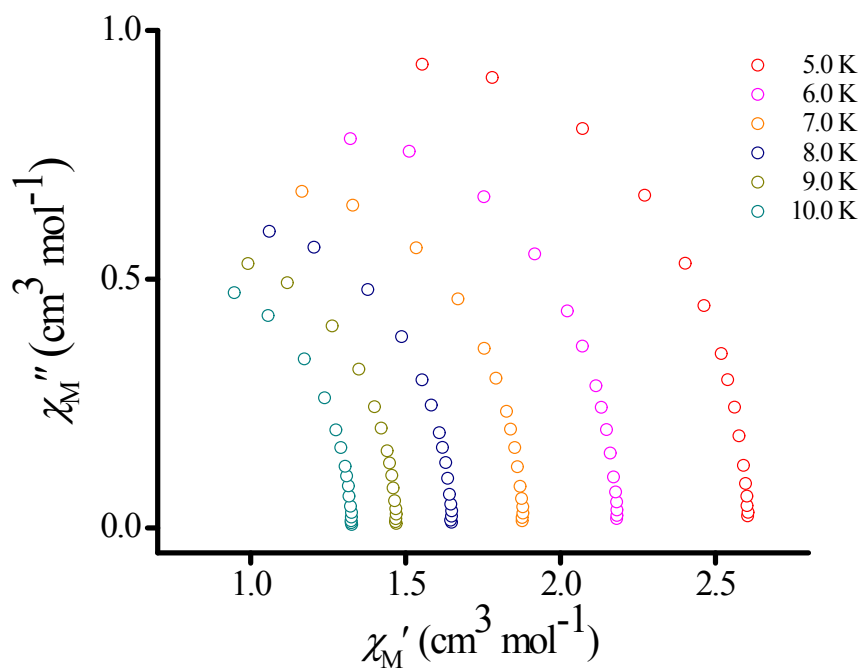

Fig. S6 Cole-Cole diagrams plotted in  $\chi_M''$  versus  $\chi_M'$  for complex 2 in  $H_{dc} = 0$ .

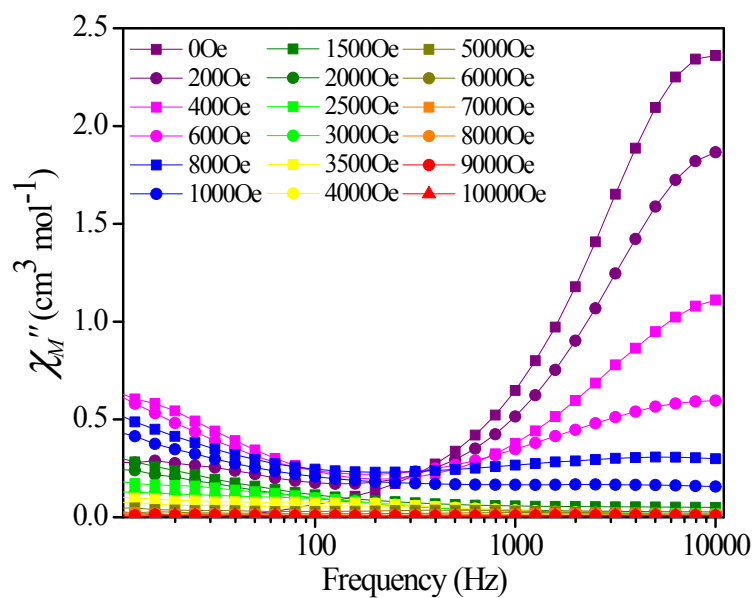

Fig. S7 Frequency dependence of the ac susceptibility measured in various external dc fields below 10000 Oe for complex 2 at 1.8 K.

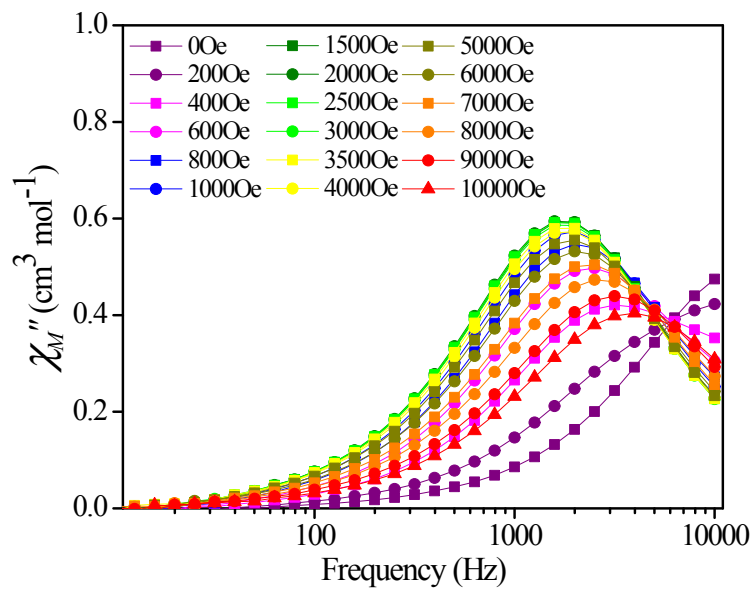

**Fig. S8** Frequency dependence of the ac susceptibility measured in various external dc fields below 10000 Oe for complex **2** at 10 K.

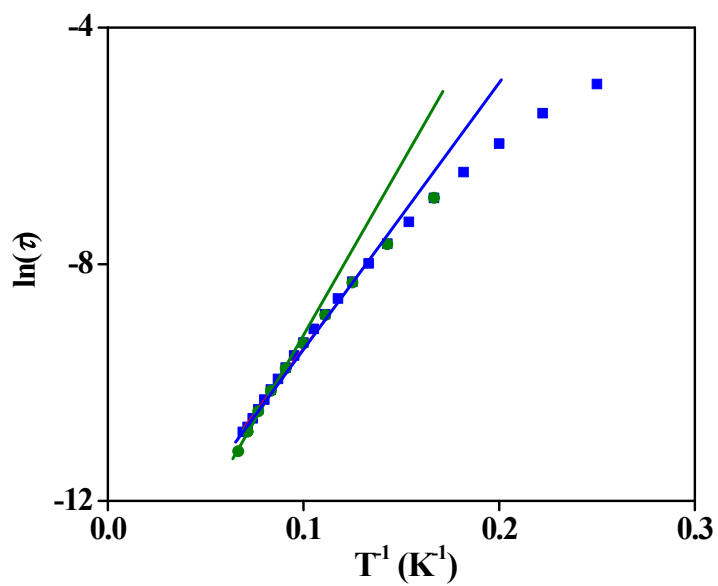

**Fig. S9**  $\ln(\tau)$  vs.  $T^{-1}$  plot for complex **2** obtained from (blue dots) frequency-dependent ac magnetic susceptibilities and the (green dots) Cole-Cole analyses under 3000 Oe dc field. The solid lines are the best fits.

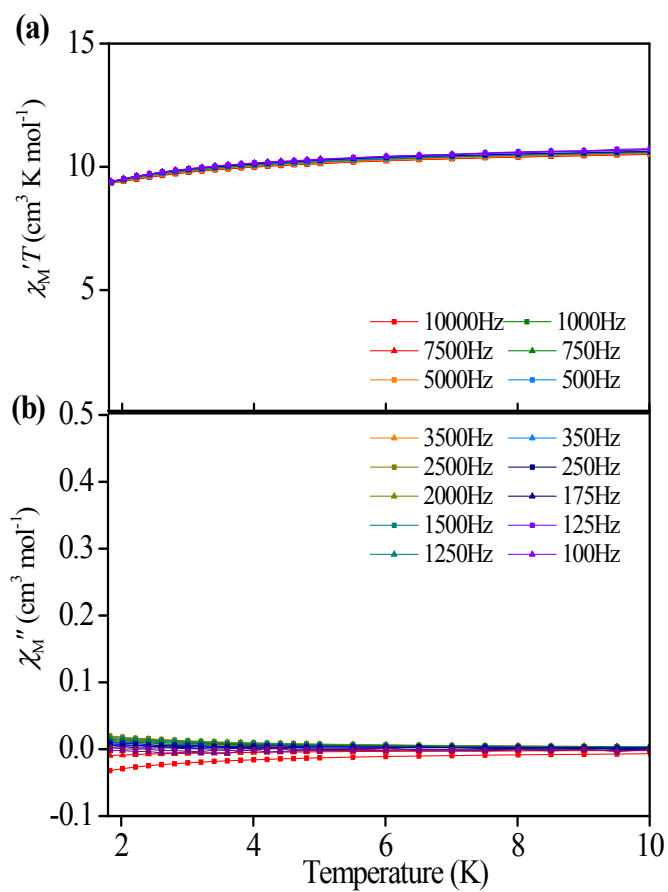

**Fig. S10** (a) Plots of  $\chi_M' T$  and (b)  $\chi_M''$  vs. temperature for a microcrystalline sample of complex **1** in a 3.5-Oe ac field and zero-dc field. The data were collected in an ac field oscillating at the indicated frequency.

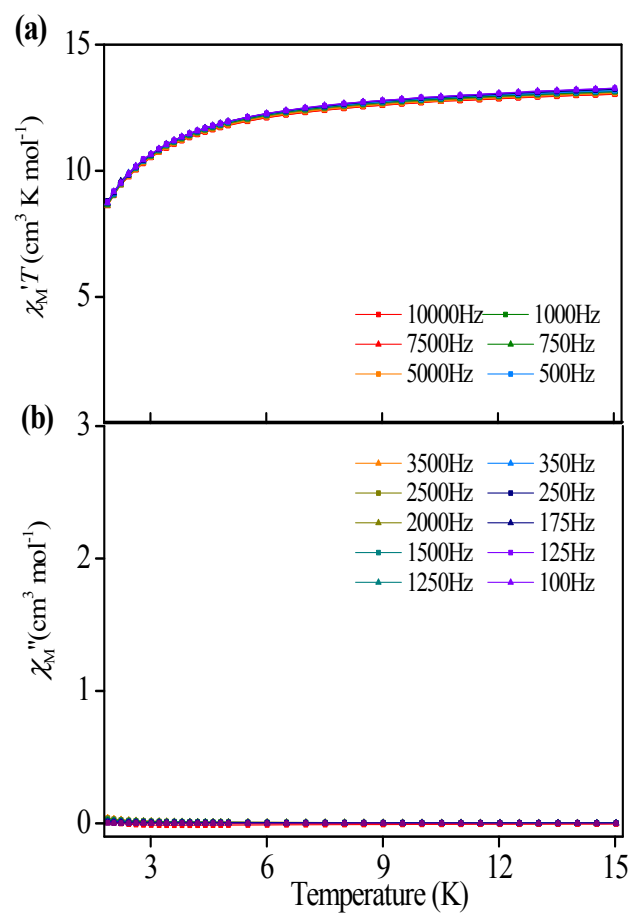

**Fig. S11** (a) Plots of  $\chi_M' T$  and (b)  $\chi_M''$  vs. temperature for a microcrystalline sample of complex **3** in a 3.5-Oe ac field and zero-dc field. The data were collected in an ac field oscillating at the indicated frequency.

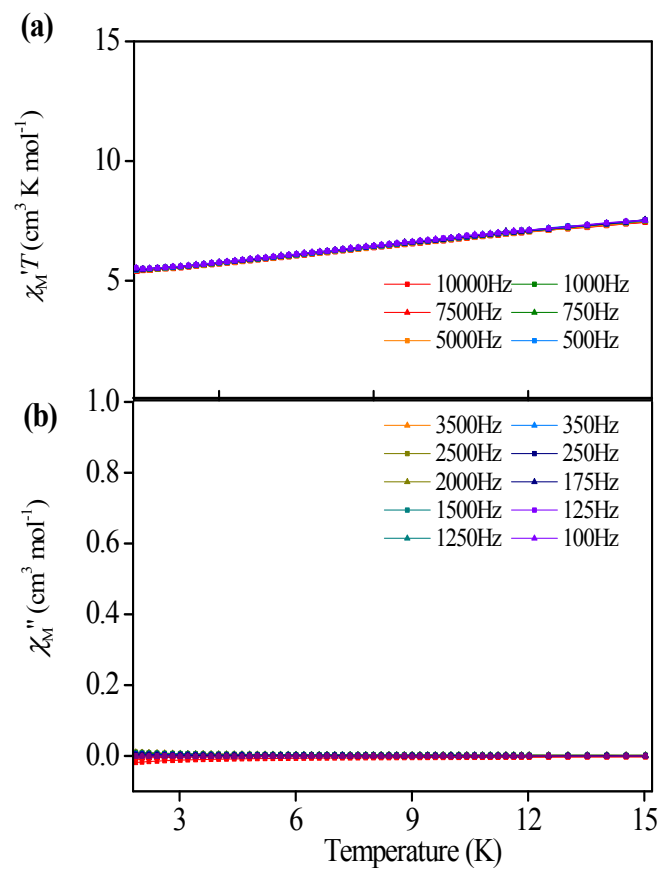

**Fig. S12** (a) Plots of  $\chi_M' T$  and (b)  $\chi_M''$  vs. temperature for a microcrystalline sample of complex **4** in a 3.5-Oe ac field and zero-dc field. The data were collected in an ac field oscillating at the indicated frequency.



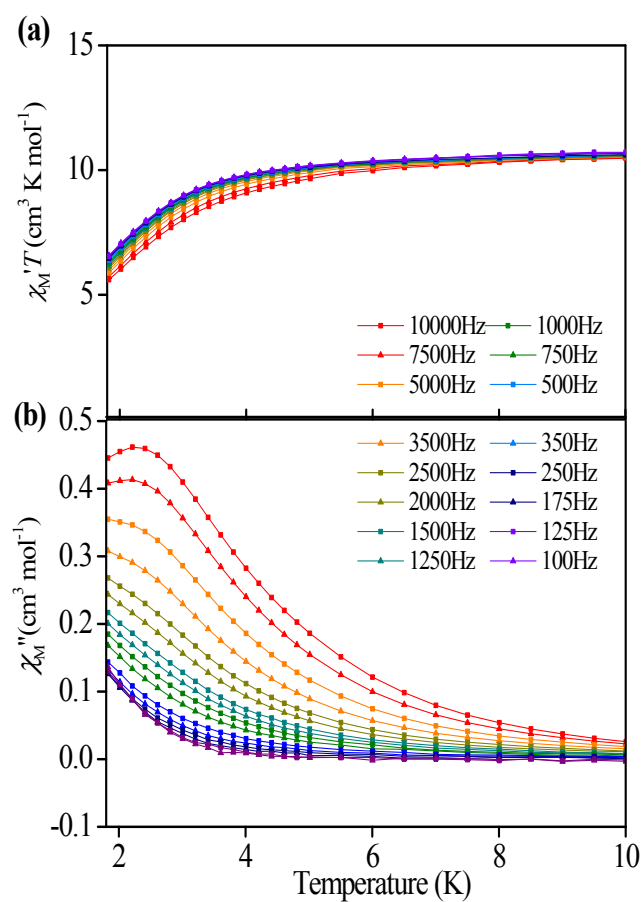

**Fig. S13** (a) Plots of  $\chi_M' T$  and (b)  $\chi_M''$  vs. temperature for a microcrystalline sample of complex **1** in a 1000 Oe dc field. The data were collected in an ac field oscillating at the indicated frequency.

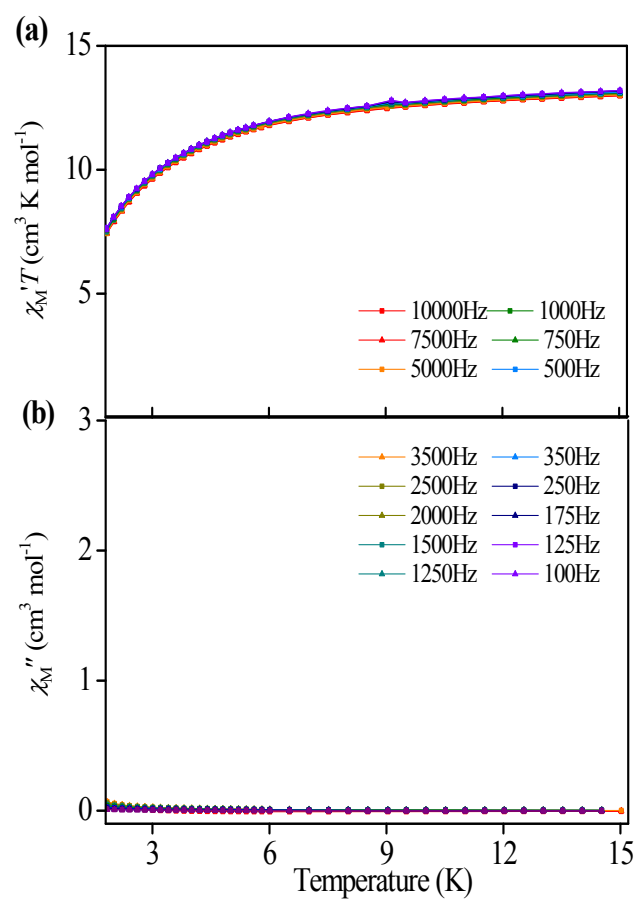

**Fig. S14** (a) Plots of  $\chi_M' T$  and (b)  $\chi_M''$  vs. temperature for a microcrystalline sample of complex **3** in a 1500 Oe dc field. The data were collected in an ac field oscillating at the indicated frequency.

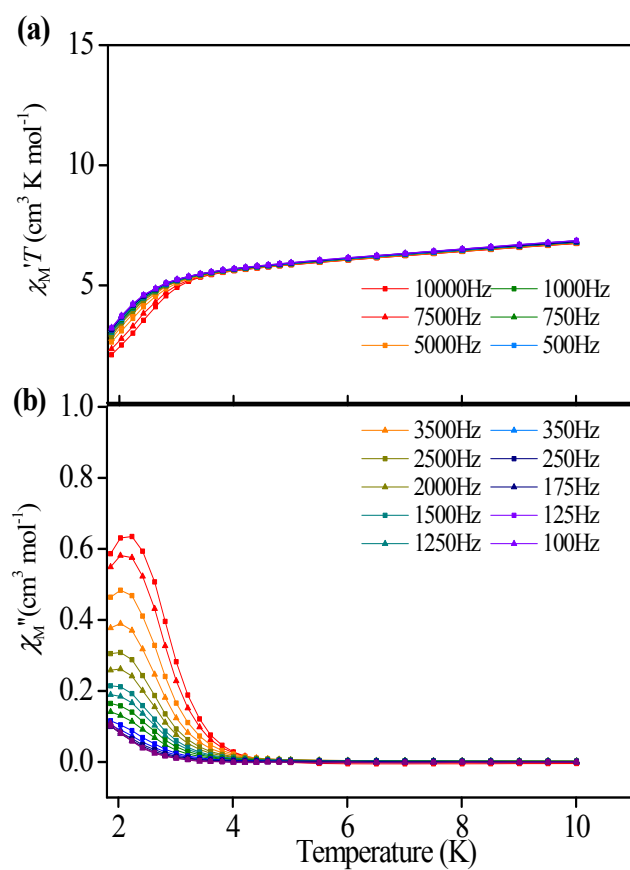

**Fig. S15** (a) Plots of  $\chi_M' T$  and (b)  $\chi_M''$  vs. temperature for a microcrystalline sample of complex **4** in a 1000 Oe dc field. The data were collected in an ac field oscillating at the indicated frequency.

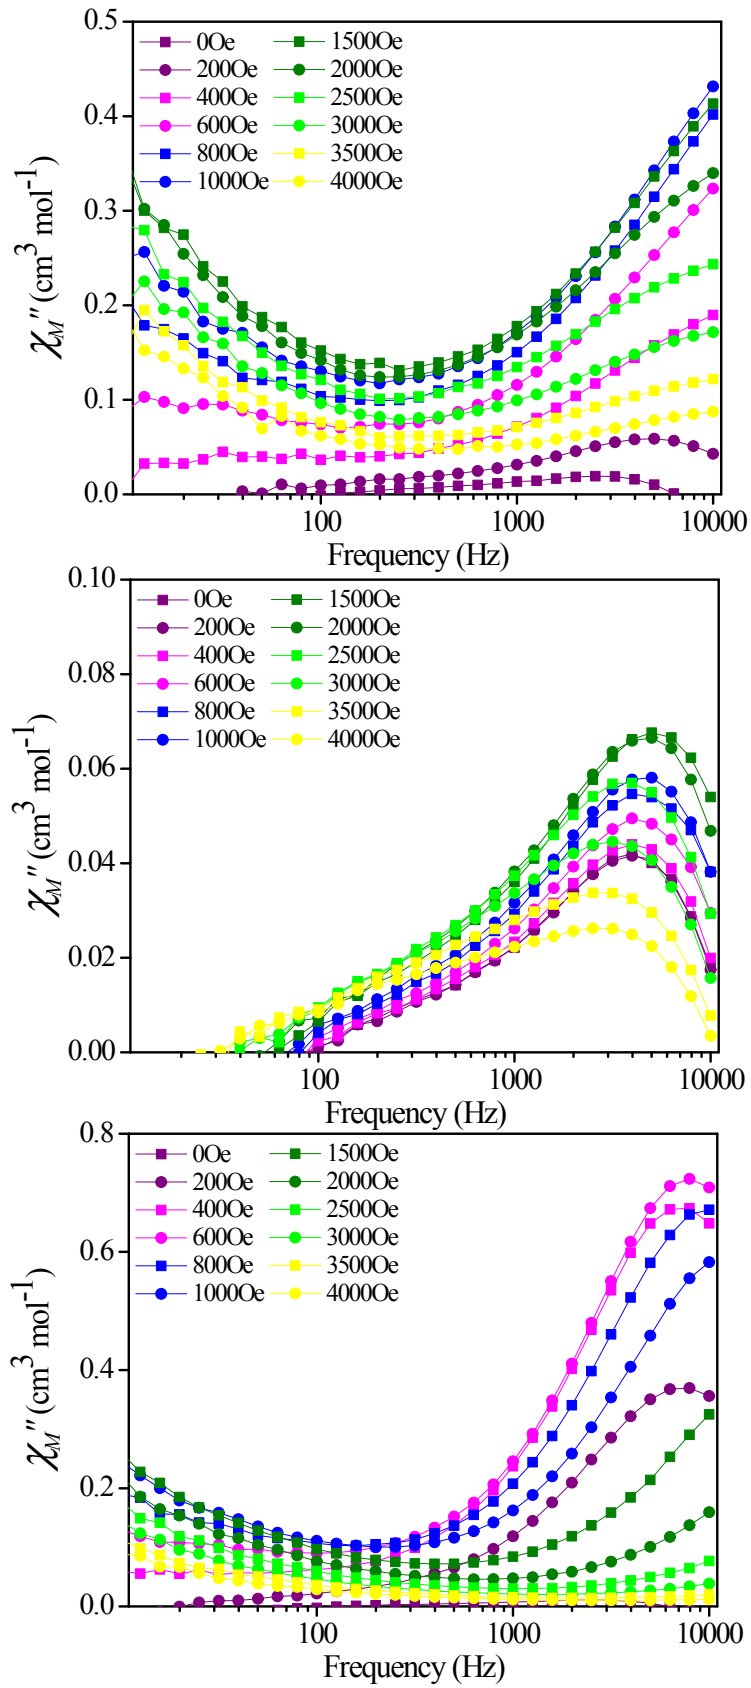

**Fig. S16** Frequency dependence of the ac susceptibility measured in various external dc fields at 1.8 K for (top) **1**, (middle) **3**, and (bottom) **4**.

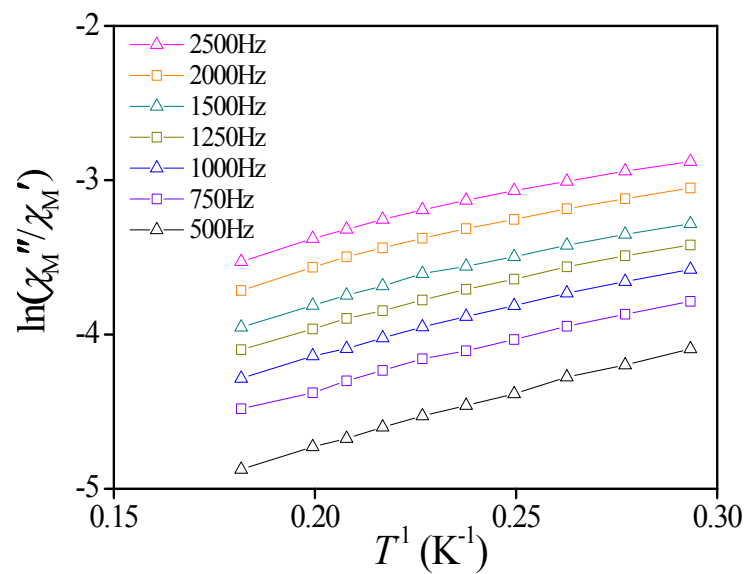

**Fig. S17** Plot of natural logarithm of  $\chi_M''/\chi_M'$  vs.  $T^{-1}$  for **1**. The solid line represents the fitting results over the range 500–2500 Hz.

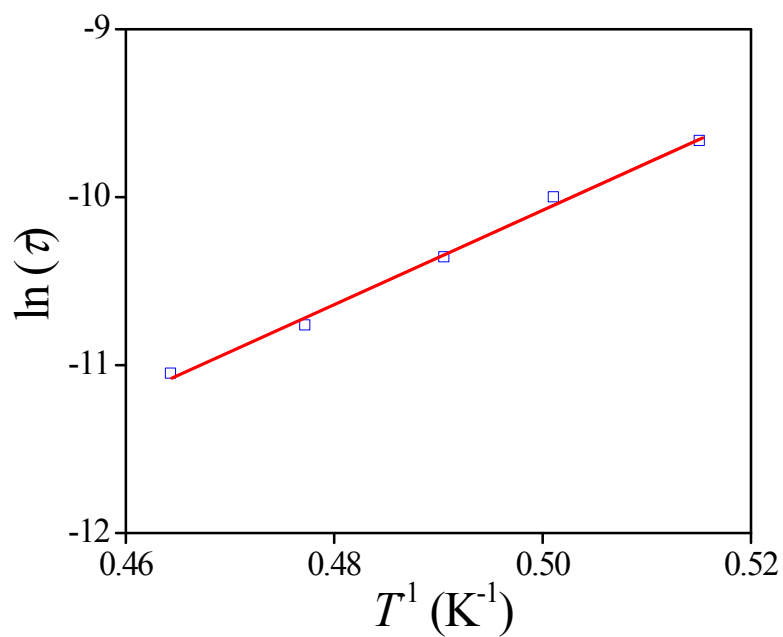

**Fig. S18** Relaxation time of magnetisation  $\ln(\tau)$  vs.  $T^{-1}$  plot for complex **4** obtained from frequency-dependent ac magnetic susceptibility measurements under 1000 Oe dc field. Solid line was fitted with the Arrhenius law.

**Table S1** Selected bond distances (Å) and bond angles (°) for complexes **1**, **2**, **3**, and **4**.

---

| Complex 1       |            |                 |            |
|-----------------|------------|-----------------|------------|
| Tb(1)-O(1)      | 2.188(3)   | Tb(1)-O(2)      | 2.372(2)   |
| Tb(1)-O(3)      | 2.241(2)   | Tb(1)-O(6)      | 2.497(2)   |
| Tb(1)-O(4)      | 2.332(3)   | Tb(1)-O(7)      | 2.492(3)   |
| Tb(1)-O(5)      | 2.355(3)   | Tb(1)-N(1)      | 2.559(3)   |
| O(1)-Tb(1)-O(3) | 94.18(10)  | O(2)-Tb(1)-O(7) | 138.67(9)  |
| O(1)-Tb(1)-O(4) | 150.74(10) | O(1)-Tb(1)-O(6) | 77.01(9)   |
| O(3)-Tb(1)-O(4) | 90.53(12)  | O(3)-Tb(1)-O(6) | 75.59(8)   |
| O(1)-Tb(1)-O(5) | 95.79(12)  | O(4)-Tb(1)-O(6) | 76.26(10)  |
| O(3)-Tb(1)-O(5) | 158.11(9)  | O(5)-Tb(1)-O(6) | 125.70(10) |
| O(4)-Tb(1)-O(5) | 90.24(13)  | O(2)-Tb(1)-O(6) | 142.85(9)  |
| O(1)-Tb(1)-O(2) | 134.37(9)  | O(7)-Tb(1)-O(6) | 51.12(8)   |
| O(3)-Tb(1)-O(2) | 81.75(8)   | O(1)-Tb(1)-N(1) | 69.90(9)   |
| O(4)-Tb(1)-O(2) | 74.89(9)   | O(3)-Tb(1)-N(1) | 82.97(9)   |
| O(5)-Tb(1)-O(2) | 77.34(10)  | O(4)-Tb(1)-N(1) | 139.36(10) |
| O(1)-Tb(1)-O(7) | 78.57(10)  | O(5)-Tb(1)-N(1) | 82.24(10)  |
| O(3)-Tb(1)-O(7) | 126.61(9)  | O(2)-Tb(1)-N(1) | 64.49(9)   |
| O(4)-Tb(1)-O(7) | 75.50(11)  | O(7)-Tb(1)-N(1) | 138.46(10) |
| O(5)-Tb(1)-O(7) | 74.61(10)  | O(6)-Tb(1)-N(1) | 138.83(9)  |

---

Symmetry transformations used to generate equivalent atoms:

#1 -x+1/2,y+1/2,z    #2 -x+1/2,y-1/2,z

---

| Complex 2       |            |                 |            |
|-----------------|------------|-----------------|------------|
| Dy(1)-O(1)      | 2.1781(19) | Dy(1)-O(2)      | 2.3665(18) |
| Dy(1)-O(3)      | 2.2340(18) | Dy(1)-O(6)      | 2.4850(19) |
| Dy(1)-O(4)      | 2.316(2)   | Dy(1)-O(7)      | 2.4906(19) |
| Dy(1)-O(5)      | 2.344(2)   | Dy(1)-N(1)      | 2.545(2)   |
| O(1)-Dy(1)-O(3) | 93.58(7)   | O(2)-Dy(1)-O(6) | 138.38(6)  |
| O(1)-Dy(1)-O(4) | 150.31(7)  | O(1)-Dy(1)-O(7) | 76.89(7)   |
| O(3)-Dy(1)-O(4) | 91.05(8)   | O(3)-Dy(1)-O(7) | 75.22(6)   |
| O(1)-Dy(1)-O(5) | 96.68(8)   | O(4)-Dy(1)-O(7) | 76.01(7)   |
| O(3)-Dy(1)-O(5) | 157.86(7)  | O(5)-Dy(1)-O(7) | 126.25(7)  |
| O(4)-Dy(1)-O(5) | 89.69(9)   | O(2)-Dy(1)-O(7) | 141.62(6)  |
| O(1)-Dy(1)-O(2) | 135.31(7)  | O(6)-Dy(1)-O(7) | 51.52(6)   |
| O(3)-Dy(1)-O(2) | 81.47(6)   | O(1)-Dy(1)-N(1) | 70.34(7)   |

---

|                 |           |                 |           |
|-----------------|-----------|-----------------|-----------|
| O(4)-Dy(1)-O(2) | 74.37(7)  | O(3)-Dy(1)-N(1) | 82.76(7)  |
| O(5)-Dy(1)-O(2) | 77.44(7)  | O(4)-Dy(1)-N(1) | 139.35(7) |
| O(1)-Dy(1)-O(6) | 78.66(7)  | O(5)-Dy(1)-N(1) | 82.32(8)  |
| O(3)-Dy(1)-O(6) | 126.66(6) | O(2)-Dy(1)-N(1) | 64.98(6)  |
| O(4)-Dy(1)-O(6) | 75.11(8)  | O(6)-Dy(1)-N(1) | 138.71(7) |
| O(5)-Dy(1)-O(6) | 74.77(7)  | O(7)-Dy(1)-N(1) | 138.96(7) |

Symmetry transformations used to generate equivalent atoms:

#1  $-x+1/2, y-1/2, z$     #2  $-x+1/2, y+1/2, z$

---

### Complex 3

---

|                 |            |                 |            |
|-----------------|------------|-----------------|------------|
| Ho(1)-O(1)      | 2.175(3)   | Ho(1)-O(2)      | 2.349(2)   |
| Ho(1)-O(3)      | 2.216(2)   | Ho(1)-O(6)      | 2.469(3)   |
| Ho(1)-O(4)      | 2.307(3)   | Ho(1)-O(7)      | 2.472(3)   |
| Ho(1)-O(5)      | 2.326(3)   | Ho(1)-N(1)      | 2.536(3)   |
| O(1)-Ho(1)-O(3) | 93.65(11)  | O(2)-Ho(1)-O(6) | 141.53(9)  |
| O(1)-Ho(1)-O(4) | 150.19(11) | O(1)-Ho(1)-O(7) | 78.35(10)  |
| O(3)-Ho(1)-O(4) | 91.98(13)  | O(3)-Ho(1)-O(7) | 126.66(9)  |
| O(1)-Ho(1)-O(5) | 96.49(12)  | O(4)-Ho(1)-O(7) | 74.85(12)  |
| O(3)-Ho(1)-O(5) | 158.26(10) | O(5)-Ho(1)-O(7) | 74.39(10)  |
| O(4)-Ho(1)-O(5) | 88.73(14)  | O(2)-Ho(1)-O(7) | 138.27(9)  |
| O(1)-Ho(1)-O(2) | 135.58(9)  | O(6)-Ho(1)-O(7) | 51.77(9)   |
| O(3)-Ho(1)-O(2) | 81.70(9)   | O(1)-Ho(1)-N(1) | 70.37(10)  |
| O(4)-Ho(1)-O(2) | 74.21(10)  | O(3)-Ho(1)-N(1) | 83.09(10)  |
| O(5)-Ho(1)-O(2) | 77.60(10)  | O(4)-Ho(1)-N(1) | 139.42(10) |
| O(1)-Ho(1)-O(6) | 76.81(10)  | O(5)-Ho(1)-N(1) | 82.29(11)  |
| O(3)-Ho(1)-O(6) | 74.96(9)   | O(2)-Ho(1)-N(1) | 65.21(9)   |
| O(4)-Ho(1)-O(6) | 76.46(11)  | O(6)-Ho(1)-N(1) | 138.96(9)  |
| O(5)-Ho(1)-O(6) | 126.12(11) | O(7)-Ho(1)-N(1) | 138.27(10) |

Symmetry transformations used to generate equivalent atoms:

#1  $-x+1/2, y+1/2, z$     #2  $-x+1/2, y-1/2, z$

---

### Complex 4

---

|            |          |            |          |
|------------|----------|------------|----------|
| Er(1)-O(1) | 2.163(5) | Er(1)-O(2) | 2.341(4) |
| Er(1)-O(3) | 2.209(4) | Er(1)-O(7) | 2.461(5) |
| Er(1)-O(5) | 2.313(5) | Er(1)-O(6) | 2.465(5) |

|                 |            |                 |            |
|-----------------|------------|-----------------|------------|
| Er(1)-O(4)      | 2.303(6)   | Er(1)-N(1)      | 2.508(6)   |
| O(1)-Er(1)-O(3) | 93.97(19)  | O(2)-Er(1)-O(7) | 140.83(17) |
| O(1)-Er(1)-O(5) | 96.7(2)    | O(1)-Er(1)-O(6) | 78.03(18)  |
| O(3)-Er(1)-O(5) | 158.50(18) | O(3)-Er(1)-O(6) | 126.18(18) |
| O(1)-Er(1)-O(4) | 149.59(19) | O(5)-Er(1)-O(6) | 74.49(19)  |
| O(3)-Er(1)-O(4) | 92.8(2)    | O(4)-Er(1)-O(6) | 74.1(2)    |
| O(5)-Er(1)-O(4) | 87.4(3)    | O(2)-Er(1)-O(6) | 138.04(17) |
| O(1)-Er(1)-O(2) | 136.48(17) | O(7)-Er(1)-O(6) | 51.82(17)  |
| O(3)-Er(1)-O(2) | 81.69(17)  | O(1)-Er(1)-N(1) | 71.00(17)  |
| O(5)-Er(1)-O(2) | 77.72(18)  | O(3)-Er(1)-N(1) | 83.92(17)  |
| O(4)-Er(1)-O(2) | 73.86(18)  | O(5)-Er(1)-N(1) | 82.0(2)    |
| O(1)-Er(1)-O(7) | 76.63(18)  | O(4)-Er(1)-N(1) | 139.27(19) |
| O(3)-Er(1)-O(7) | 74.45(16)  | O(2)-Er(1)-N(1) | 65.48(17)  |
| O(5)-Er(1)-O(7) | 126.24(19) | O(7)-Er(1)-N(1) | 139.42(17) |
| O(4)-Er(1)-O(7) | 76.8(2)    | O(6)-Er(1)-N(1) | 138.29(19) |

Symmetry transformations used to generate equivalent atoms:

#1  $-x+3/2, y+1/2, z$     #2  $-x+3/2, y-1/2, z$

**Table S2**  $\tau$  and  $\nu$  from the peak maxima of complex **2** at the corresponding temperatures from  $\chi_M''$  vs.  $\nu$  plots.

| T (K) | $\nu$ (Hz) | $\tau$ (s)            |
|-------|------------|-----------------------|
| 14.5  | 8066.776   | $1.97 \times 10^{-5}$ |
| 14    | 7418.225   | $2.15 \times 10^{-5}$ |
| 13.5  | 6418.004   | $2.48 \times 10^{-5}$ |
| 13    | 5519.503   | $2.88 \times 10^{-5}$ |
| 12.5  | 4682.74    | $3.4 \times 10^{-5}$  |
| 12    | 3949.117   | $4.03 \times 10^{-5}$ |
| 11.5  | 3296.097   | $4.83 \times 10^{-5}$ |
| 11    | 2722.074   | $5.85 \times 10^{-5}$ |
| 10.5  | 2219.729   | $7.17 \times 10^{-5}$ |
| 10    | 1784.843   | $8.92 \times 10^{-5}$ |
| 9.5   | 1415.794   | $1.12 \times 10^{-4}$ |
| 9     | 1105.096   | $1.44 \times 10^{-4}$ |
| 8.5   | 847.8129   | $1.88 \times 10^{-4}$ |
| 8     | 637.8227   | $2.5 \times 10^{-4}$  |



**Table S3** The  $\alpha$  parameters and  $\tau$  of complex **2** from Cole-Cole analyses.

| $T$ (K) | $\alpha$ | $\tau$ (s)            |
|---------|----------|-----------------------|
| 6       | 0.078    | $1.03 \times 10^{-3}$ |
| 7       | 0.063    | $4.71 \times 10^{-4}$ |
| 8       | 0.054    | $2.46 \times 10^{-4}$ |
| 9       | 0.048    | $1.42 \times 10^{-4}$ |
| 10      | 0.043    | $8.80 \times 10^{-5}$ |
| 11      | 0.039    | $5.76 \times 10^{-5}$ |
| 12      | 0.037    | $3.95 \times 10^{-5}$ |
| 13      | 0.034    | $2.79 \times 10^{-5}$ |
| 14      | 0.036    | $1.98 \times 10^{-5}$ |
| 15      | 0.036    | $1.42 \times 10^{-5}$ |
